# Supplementary material for: Neuroprotective Effect of Curcumin-Loaded RGD Peptide-PEGylated Nanoliposomes
Source: MDPI journal article supplement (doi:10.3390/pharmaceutics15122665), 2023-11-24
Supplement: s1 [file s1]

## Supporting information

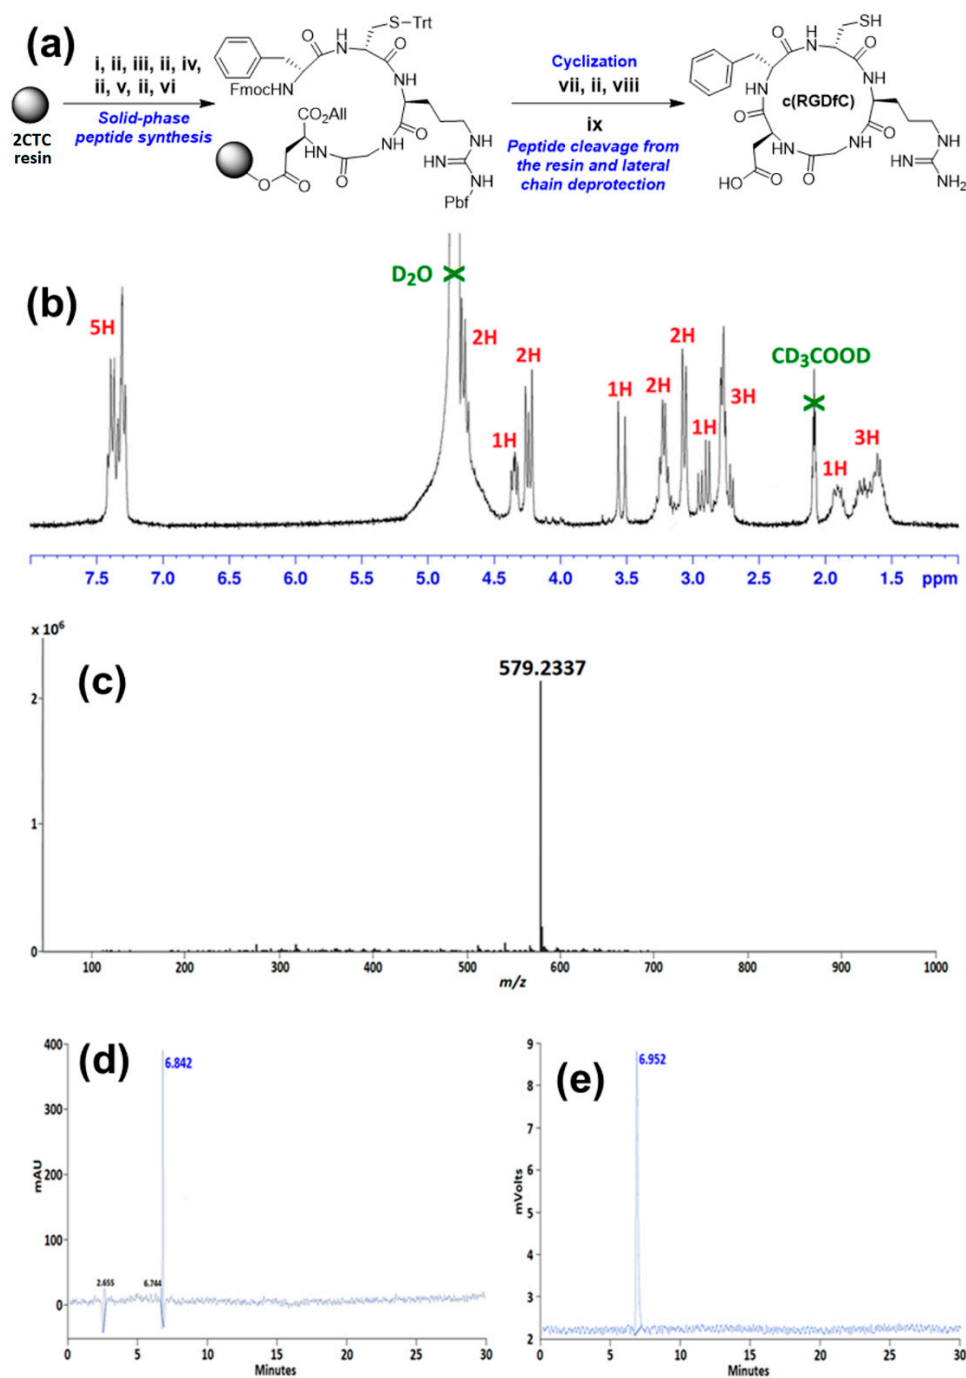

**Figure S1.** Synthesis and characterizations of c(RGDfC). (a) SPPS synthesis. (b)  $^1\text{H}$  NMR spectrum (300 MHz) in  $\text{D}_2\text{O}/\text{CD}_3\text{COOD}$  (98/2, v/v). (c) HRMS spectrum. RP-HPLC chromatogram was detected using (d) UV-visible ( $\lambda_{\text{abs}} = 214$  nm) and (e) fluorescence ( $\lambda_{\text{abs}} = 257$  nm and  $\lambda_{\text{em}} = 274$  nm).
